1 **Locus Coeruleus Integrity in Older Adults with and without Chronic Pain**

2

3 Tyler R. Bell,<sup>1,2</sup> Carol E. Franz,<sup>1,2</sup> Lisa T. Eyler,<sup>1</sup> Christine Fennema-Notestine,<sup>1,2,3</sup> Olivia K.  
4 Puckett,<sup>1,2</sup> Stephen M. Dorros,<sup>3</sup> Matthew S. Panizzon,<sup>1,2</sup> Rahul C. Pearce,<sup>1,2</sup> Donald J. Hagler,<sup>1,3</sup>  
5 Michael J. Lyons,<sup>4</sup> Asad Beck,<sup>5</sup> Jeremy A. Elman,<sup>1,2\*</sup> William S. Kremen<sup>1,2\*</sup>

6

7 \*Dr. Elman and Dr. Kremen are joint senior authors.

8

9 <sup>1</sup>Department of Psychiatry, University of California San Diego, San Diego, La Jolla, CA, 92093

10 <sup>2</sup>Center for Behavior Genetics of Aging, University of California, San Diego, La Jolla, CA,  
11 92093

12 <sup>3</sup>Department of Radiology, University of California San Diego, San Diego, La Jolla, CA, 92093

13 <sup>4</sup>Department of Psychology, Boston University, Boston, MA, USA, 02215

14 <sup>5</sup>Graduate Program in Neuroscience, University of Washington, Seattle, Washington, USA,  
15 98195

16

17

18

19 Running head: LOCUS COERULEUS AND CHRONIC PAIN

## LOCUS COERULEUS AND CHRONIC PAIN

20  
21  
22  
23  
24  
25  
26  
27  
28  
29  
30  
31  
32  
33  
34  
35  
36  
37  
38  
39  
40

### Abstract

The locus coeruleus (LC) is a brainstem region involved in regulating pain. Chronic pain is common in older adulthood, but no studies have examined its association with the LC in humans. We used neuromelanin-sensitive imaging to study differences in LC integrity in older adults with and without chronic pain. Chronic pain was assessed in community-dwelling men from the Vietnam Era Twin Study of Aging (VETSA) in 3 study waves covering an average of 12 years. Pain was self-reported on the SF-36 Bodily Pain Scale. Chronic pain was defined as moderate to severe pain severity at the current and at least one prior wave; 17% had chronic pain ( $n=80$ ). At the third wave, 481 participants (mean age=67.57) underwent neuromelanin-sensitive MRI scans from which we calculated an LC contrast-to-noise ratio ( $LC_{CNR}$ ) – an index of LC integrity. We examined associations between chronic pain and  $LC_{CNR}$  (in the rostral LC and caudal regions) with generalized estimating equations after adjusting for age, race, education, depressive symptoms, medical comorbidities, and opioid medication use. Individuals with chronic pain had .35 standard deviation lower rostral  $LC_{CNR}$  (95% CI: -.62 to -.05) compared to those without chronic pain. No differences in the caudal  $LC_{CNR}$  were detected. Chronic pain was associated with decreased rostral LC integrity in older adults. Differences in the rostral LC, rather than caudal LC, suggest the association between lower LC integrity and chronic pain may be related to pain processing in cortical regions where rostral LC projections typically connect.

## LOCUS COERULEUS AND CHRONIC PAIN

### 41 **Introduction**

42       Approximately 27%-33% of older adults experience chronic pain, i.e., pain lasting three  
43 or more months [16]. Such pain is linked to increased risk of cognitive impairment [23,54],  
44 negative affective symptoms [2,12,27], sleep disruption [15], and reduced physical function in  
45 older adults [47]. Identifying brain regions related to chronic pain in older adults may help  
46 uncover reasons for poor pain modulation and other clinical symptoms. Human neuroimaging  
47 studies have found evidence of reduced gray matter volume and white matter integrity [2;10].  
48 Animal studies suggest that the brainstem might also play an important role in pain [33].  
49 However, this region has not been examined in pain studies of humans. A brainstem region of  
50 particular interest is the locus coeruleus (LC), a small nucleus (30-60mm<sup>3</sup>) that serves as the  
51 central projection site for norepinephrine (NE) [49].

52       The LC is essential to acute pain processing. After tissue damage, nociceptive signals are  
53 gated (allowed to ascend or not) at inter-neuronal spaces throughout the dorsal horn and further  
54 modulated by caudal LC projections to pre- and post-synaptic terminals [37]. Nociceptive signals  
55 received by the caudal LC then modulate sensory and affective pain processing in cortical  
56 regions. Sensory pain processing involves caudal and rostral LC-NE projections to the thalamus  
57 and parietal cortices that determine whether one feels pain and where. Affective pain processing  
58 involves rostral LC-NE projections to the prefrontal cortex, amygdala, and insula [38] that  
59 determine how one feels and responds to pain. Because of the essential roles of the LC in acute  
60 pain processing, chronic pain may involve poorer structural integrity of this region [43].

61       Different theories of chronic pain and neurodegeneration may suggest how chronic pain  
62 and LC integrity may be associated. *Active theory* suggests that pain initiates signaling from the  
63 spinal cord to the brain that in turn results in neuroinflammatory processes and brain atrophy,

## LOCUS COERULEUS AND CHRONIC PAIN

64 due to increased cytokine levels [26,31,52] and/or increased tau and beta-amyloid formation  
65 [13,17,24,25]. *Passive theory* posits that many age-associated neurodegenerative diseases harm  
66 pain-processing brain regions, a consequence of which is the experience of chronic pain. Chronic  
67 pain following major neurodegenerative diseases such as dementia, Parkinson’s disease, and  
68 motor neuron disease are in support of this theory [18]. Lastly, *developmental theory* suggests  
69 that early brain characteristics put people at risk for chronic pain due to poor pain modulation, as  
70 shown in prospective studies [5,50].

71 Here we examined the association between chronic pain and LC integrity in older adults  
72 for the first time. LC structural integrity was based on an MRI measure of neuromelanin signal  
73 [33]. We hypothesized that people with chronic pain would show lower LC integrity compared  
74 to people without chronic pain. We examined the rostral and caudal LC regions separately, given  
75 the importance of their respective connections to cortical sensory/affective pain processing and  
76 nociceptive gating in the dorsal horn [42]. Neuromelanin signals from the middle LC were  
77 combined with the rostral signals as both regions have overlapping projection sites and similar  
78 changes related to age and neurodegenerative disease [9,10,37].

## 79 **Methods**

### 80 **Participants**

81 Participants were from the Vietnam Era Twin Study of Aging (VETSA), a longitudinal  
82 study of male twins assessed at average ages 56, 62, and 68 – an approximately 12-year time  
83 span [34]. All participants served in the military at some time during the Vietnam era (1965-  
84 1975). The majority did not serve in Southeast Asia, and about 80% reported no combat  
85 exposure. This sample is representative of general community-dwelling men in their age range  
86 on demographics, health, and other lifestyle factors based on Centers for Disease Control and

## LOCUS COERULEUS AND CHRONIC PAIN

87 Prevention data [44]. Previous studies have described the methodology and available data in the  
88 VETSA project [34,35]. Data are publicly accessible to researchers through data authorization  
89 (<http://www.vetsatwins.org/for-researchers/>). Procedures of the VETSA were approved by the  
90 Institutional Review Boards at the University of California, San Diego, and Boston University.

91 LC imaging was introduced at wave 3 (2016 to 2019). Of eligible MRI participants, 485  
92 (92.4%) met standard MRI inclusion criteria (e.g., no metal in the body) and completed imaging  
93 of the LC. Four were excluded due to poor image quality. The final sample consisted of 481  
94 individuals with an average age of 67.52 years ( $SD = 2.60$ , range = 61.96 to 71.72).

95 Demographic characteristics of this sample can be seen in Table 1.

### 96 **Measures**

#### 97 **Chronic pain**

98 Pain was assessed using the SF-36 Quality of Life (Version 1.0) Bodily Pain Scale [53],  
99 which was given at each assessment wave. Specifically, we used the pain severity item  
100 (Question 22) asking participants, “How much pain severity have you had during the past 4  
101 weeks”. Severity was rated on a 6-point Likert-type scale from “None” (1), “Very Mild”  
102 (2), “Mild” (3), “Moderate” (4), “Severe” (5), “Very Severe” (6). Chronic pain was defined as  
103 moderate to very severe pain (values 4-6 on the scale) at wave 3 and the previous participating  
104 wave. Pain reported over two or more waves (approximately 6 to 12 years) fits common  
105 definitions of chronic pain as moderate to severe pain severity [32] that lasts 3 or more months  
106 [16]. People with no pain or pain during only one wave were classified as not having chronic  
107 pain.

108

## LOCUS COERULEUS AND CHRONIC PAIN

### 109 **LC MRI Acquisition and Processing**

110 We previously described our procedures for MRI imaging of the LC [20]. In brief,  
111 participants completed scans in GE 3T Discovery 750x scanners (GE Healthcare, Waukesha, WI,  
112 USA) with an eight-channel phased-array head coil. Oblique axial FSE-T1-weighted images  
113 were then obtained (TR = 600 ms; TE = 14 ms; flip angle = 90<sup>0</sup>; matrix = 512 × 320; FOV = 220  
114 mm; pixel size 0.42 × 0.68 mm; 10 slices; slice thickness = 2.5 mm; interslice gap = 1 mm).

115 Each image was manually marked by two of four experienced raters according to  
116 methods described in detail previously [22]. Briefly, signal intensities were derived from  
117 manually marked regions of interest (ROIs) on three axially oriented slices corresponding to  
118 rostral, middle, and caudal LC. On each slice, a 3mm<sup>2</sup>-voxel crosshair-shaped ROI was placed  
119 over left and right LC and a 10 mm<sup>2</sup> square reference ROI was placed in the pontine tegmentum  
120 (PT). Mean signal was then extracted from each ROI. The values from left and right LC were  
121 highly correlated ( $r_s > .98$ ) and were subsequently averaged for each slice. Finally, LC contrast-  
122 to-noise ratio ( $LC_{CNR}$ ) values were calculated for each slice as  $LC_{CNR} = (LC_{intensity} -$   
123  $PT_{intensity}) / PT_{intensity}$ . Higher  $LC_{CNR}$  values are thought to reflect better LC structural integrity  
124 [33]. For each individual, we calculated the rostral and caudal  $LC_{CNR}$ : we averaged  $LC_{CNR}$   
125 values from the rostral and middle slices to derive the final rostral  $LC_{CNR}$  value and used the  
126  $LC_{CNR}$  value from the caudal marked slice to derive the final caudal  $LC_{CNR}$  value.

### 127 **Covariates**

128 Variables that could confound an association between chronic pain and  $LC_{CNR}$  were  
129 included as covariates. These included age, race/ethnicity (non-Hispanic white versus other),  
130 education (years), depressive symptoms indexed using the 20-item Center of Epidemiological  
131 Studies scale (CES-D) [40], medical comorbidities (total number of reported major health

## LOCUS COERULEUS AND CHRONIC PAIN

132 conditions from a modified Charlson Index [14]), and the use of opioid medication based on  
133 reports of medications taken in the medical history interview (yes/no).

### 134 **Statistical Analysis**

135 Descriptive statistics are shown in Table 1, and we compared key covariates between  
136 people with and without chronic pain to identify potential confounding variables. General  
137 estimating equations (GEEs) using unstructured correlation matrices were conducted using SAS  
138 (version 9.4) to examine the association between chronic pain and LC<sub>CNR</sub>, providing effect  
139 estimates while accounting for the correlation of observations within twin pairs. Separate models  
140 were conducted for rostral and caudal LC<sub>CNR</sub> with each outcome regressed onto chronic pain  
141 status and adjusted for covariates. Statistical significance was set to an  $\alpha$  of .05, and 95%  
142 confidence intervals were calculated. Models were conducted using bootstrapping with 1000  
143 resamples to provide robust estimates.

## 144 **Results**

### 145 **Descriptive Statistics**

146 In participants completing LC<sub>CNR</sub> measurement, 16.6% ( $n = 80$ ) reported chronic pain.  
147 Compared with individuals who did not report chronic pain, participants reporting chronic pain  
148 had more depressive symptoms ( $t(97.44) = 4.30, p < .001, d = .87$ ), more medical comorbidities  
149 ( $t(98.26) = 5.16, p = .013, d = 1.04$ ), and were more likely to be using opioid medications ( $\chi^2(1)$   
150  $= 25.67, p < .001, \eta^2 = .23$ ; 16.3% versus 2.8%), but did not differ in age ( $p = .069$ ).

### 151 **Main Results**

152 Shown in Table 2 and Figure 1, participants with chronic pain had significantly lower  
153 rostral LC<sub>CNR</sub> ( $b = -.35, 95\% \text{ CI: } -.62 \text{ to } -.05, \beta = -.35, p = .042$ ) than those without chronic pain.

## LOCUS COERULEUS AND CHRONIC PAIN

154 Of the covariates, older age was associated with lower rostral LC<sub>CNR</sub> ( $b = -.04$ , 95% CI:  $-.05$  to -  
155  $.01$ ,  $\beta = -.13$ ,  $p = .027$ ). Race/ethnicity, education, depressive symptoms, medical comorbidities,  
156 and opioid use were not significantly associated with rostral LC<sub>CNR</sub> ( $ps > .05$ ).

157 As shown in Table 3 and Figure 1, participants with chronic pain did not differ from  
158 participants without chronic pain on caudal LC<sub>CNR</sub> ( $p = .755$ ). No covariate was significantly  
159 associated with caudal LC<sub>CNR</sub> ( $ps > .05$ ).

### 160 Discussion

161 Our analyses highlighted an important link between chronic pain and region-specific LC  
162 integrity in older adults. Overall, individuals with chronic pain had lower structural integrity in  
163 the rostral LC compared to those without chronic pain. This difference was not accounted for by  
164 age, depressive symptoms, medical comorbidities, or opioid use. No significant associations  
165 were observed for the caudal LC region. To our knowledge, this is the first examination of  
166 associations between chronic pain and LC integrity in humans.

167 An association between chronic pain and rostral LC integrity adds to previous literature  
168 implicating the LC in human pain modulation. Anatomical studies have linked the LC to several  
169 important brain regions involved in sensory and affective pain processing, and the LC has  
170 connections to the dorsal horn of the spine where nociceptive signals are gated [37]. Animal  
171 studies have shown a causal role of the LC in pain modulation. In rats, for example, stimulation  
172 of the LC suppresses pain while lesions to the LC increase pain sensitivity [37]. Other studies  
173 found that drugs that target the LC-NE system through gabapentinoids [28] and serotonin-  
174 norepinephrine reuptake inhibitors markedly inhibit neuropathic pain in rats with ablated or  
175 constricted nerve injury [1]. Such effects can be reversed with the application of NE antagonists  
176 [28]. Early evidence consistent with the LC-NE system's role in human pain comes from



## LOCUS COERULEUS AND CHRONIC PAIN

177 successful treatment with similar medications [4,46]. Although our study cannot determine  
178 causation, our findings are consistent with evidence that the LC is related to human pain.

179         Results were region-specific. Caudal LC integrity was not different in people with  
180 chronic pain compared to people without chronic pain. As mentioned, the rostral LC has more  
181 projection sites to cortical regions involved in the sensory and affective processing of pain, while  
182 the caudal LC has more projection sites in the dorsal horn involved in gating of nociceptive  
183 signals [37]. Although the previous literature has shown a strong role of dorsal horn activity in  
184 chronic pain [31], our study suggests that the rostral region is most related to chronic pain in  
185 humans.

186         Although chronic pain classification was based on longitudinal data at two earlier waves,  
187 LC integrity was measured only at the last wave, leaving directionality unresolved. As  
188 highlighted by active, passive, and developmental theories of chronic pain and  
189 neurodegeneration, multiple temporal directions are possible. The active theory would suggest  
190 that lower rostral LC integrity is a consequence of global brain atrophy related to chronic pain  
191 and neuroinflammation [42]. The LC may even be particularly vulnerable due to its small size  
192 and proximity to the spinal cord, where neuroinflammation is thought to originate [36,52].  
193 Passive theory would suggest that lower rostral LC integrity arises due to age-associated  
194 neurodegenerative diseases, resulting in chronic pain. Many brainstem regions are the first  
195 affected by neurodegenerative diseases, which may make the LC vulnerable. For example,  
196 Alzheimer's disease is characterized by pathology in the LC at its earliest stages [11]. Lastly,  
197 lower rostral LC integrity could represent differences from earlier brain development, making  
198 chronic pain more likely as we age [5,50]. It seems likely that associations between LC integrity  
199 and chronic pain are bidirectional and accounted for, in part, by elements of each of these

## LOCUS COERULEUS AND CHRONIC PAIN

200 theories. However, directionality and causation remain to be resolved with longitudinal  
201 assessment and experimental animal modeling.

202         Our measure of LC integrity may have functional implications to consider, especially if  
203 lower integrity reflects structural degeneration. Damaged LC regions produce more tonic levels  
204 of NE to projections sites which activate pain-processing brain regions [3,30,51]. In animal  
205 models, tonic NE release from the LC has been shown to promotes affective pain processing in  
206 the amygdala and anterior cingulate cortex specifically [55]. This has also been shown to result  
207 from inducing pain-related injury [48]. Increased tonic LC-NE outputs could explain why people  
208 with chronic pain show more tonic pupillary responses [8,39], which correlate with greater pain  
209 intensity generally [29]. Although more work will be needed to discern NE patterns, it could be  
210 that people with chronic pain have higher tonic discharge relating to lower rostral LC integrity,  
211 thereby increasing cortical pain processing. Put another way, the link between chronic pain and  
212 rostral, but not caudal, LC integrity suggests more top-down rather than bottom-up regulation of  
213 the response to pain.

214         Our finding that older adults with persistent pain have lower rostral LC integrity might  
215 explain other pain-related symptoms. In particular, the LC is a key structure involved in arousal  
216 and modulation of cognitive function. For example, our previous work in this sample showed  
217 that people with lower rostral LC integrity had greater daytime sleep-related dysfunction [21] – a  
218 symptom frequently reported in people with chronic pain [19]. Furthermore, people with chronic  
219 pain have worse cognitive performance than those without chronic pain [6,7]. Our prior work has  
220 shown better rostral LC integrity may be related to better cognitive performance and reduced risk  
221 of amnesic mild cognitive impairment [21]. In other studies, lower LC integrity has also been  
222 associated with major depressive disorder [45], a condition more common in people with chronic

## LOCUS COERULEUS AND CHRONIC PAIN

223 pain. As such, LC integrity might play a role in other phenomena associated with chronic pain,  
224 although the causal direction of the LC-pain association or the associations of chronic pain with  
225 other LC-related phenomena remains unclear.

226 Our study has some limitations and strengths. First, as mentioned, we cannot address  
227 causality, although evidence thus far suggests that the relationship may be bidirectional. Also, we  
228 cannot ascertain the pathology contributing to lower LC integrity in this population without  
229 histological data, although inflammatory processes are suspected. Secondly, our sample is  
230 entirely male and primarily non-Hispanic white, making generalizability to women and  
231 racial/ethnic minorities uncertain. Regarding strengths, we used a novel MRI approach to  
232 provide one of the first in vivo analyses of chronic pain and LC integrity while adjusting for  
233 several possible confounding factors.

234 Chronic pain is a costly condition in later life, reducing quality of life, cognitive function,  
235 and physical abilities. Identifying the biological mechanisms behind its inception and  
236 continuation is thus a worthwhile goal and could identify potential treatment targets to promote  
237 healthier aging trajectories. Such work is of increasing importance as the number of adults over  
238 age 65 will triple by 2050, along with cases of chronic pain [41]. Our study adds to previous  
239 findings linking the LC and pain, showing that older adults with chronic pain have lower rostral  
240 LC integrity than their counterparts without chronic pain. Many questions remain, but more data  
241 using neuromelanin MRI imaging and further animal modeling will be crucial, especially for  
242 determining the role of exact pathways and LC-NE discharge patterns.

243 **Author contributions:** Description of authors' roles: All authors contributed to the conception  
244 or design of the work; or the acquisition, analysis, or interpretation of the work. All authors

## LOCUS COERULEUS AND CHRONIC PAIN

245 helped to revise the work for intellectual content and approved the final draft. All authors are  
246 accountable for all aspects of the work ensuring accuracy and integrity.

247 **Sponsors' role:** This work was supported by the National Institute on Aging at the National  
248 Institutes of Health grant numbers R01s AG050595, AG022381, AG037985, AG062483, and  
249 P01 AG055367, and K01AG063805.

250 **Acknowledgments:** The content is the responsibility of the authors and does not necessarily  
251 represent official views of the NIA, NIH, or VA. The U.S. Department of Veterans Affairs,  
252 Department of Defense; National Personnel Records Center, National Archives and Records  
253 Administration; National Opinion Research Center; National Research Council, National  
254 Academy of Sciences; and the Institute for Survey Research, Temple University provided  
255 invaluable assistance in the creation of the VET Registry. The Cooperative Studies Program of  
256 the U.S. Department of Veterans Affairs provided financial support for development and  
257 maintenance of the Vietnam Era Twin Registry. We would also like to acknowledge the  
258 continued cooperation and participation of the members of the VET Registry and their families.

259 **Data availability:** VETSAs data can be accessed through data requests submitted online  
260 (<http://www.vetsatwins.org/for-researchers/>). Request for additional information regarding the  
261 specific use of data and data analytic methods may be sent to the first author.

262 **Conflict of Interest Declaration:** The authors declare the absence of known competing financial  
263 or personal relationships that could have influenced the work reported in this paper.

264

265

## LOCUS COERULEUS AND CHRONIC PAIN

266

### References

267 [1] Alba-Delgado C, Mico JA, Sanchez-Blazquez P, Berrocoso E. Analgesic antidepressants

268 promote the responsiveness of locus coeruleus neurons to noxious stimulation:

269 Implications for neuropathic pain. *Pain* 2012;153(7):1438-1449.doi:

270 [10.1016/j.pain.2012.03.034](https://doi.org/10.1016/j.pain.2012.03.034)

271 [2] Arola H-M, Nicholls E, Mallen C, Thomas E. Self-reported pain interference and symptoms

272 of anxiety and depression in community-dwelling older adults: Can a temporal

273 relationship be determined? *European Journal of Pain* 2010;14(9):966-971.doi:

274 <https://doi.org/10.1016/j.ejpain.2010.02.012>

275 [3] Aston-Jones G, Cohen JD. An integrative theory of locus coeruleus-norepinephrine function:

276 adaptive gain and optimal performance. *Annu Rev Neurosci* 2005;28:403-450.doi:

277 [10.1146/annurev.neuro.28.061604.135709](https://doi.org/10.1146/annurev.neuro.28.061604.135709)

278 [4] Backonja M, Glanzman RL. Gabapentin dosing for neuropathic pain: Evidence from

279 randomized, placebo-controlled clinical trials. *Clin Ther* 2003;25(1):81-104.doi:

280 [10.1016/s0149-2918\(03\)90011-7](https://doi.org/10.1016/s0149-2918(03)90011-7)

281 [5] Baliki MN, Petre B, Torbey S, Herrmann KM, Huang L, Schnitzer TJ, Fields HL, Apkarian

282 AV. Corticostriatal functional connectivity predicts transition to chronic back pain. *Nat*

283 *Neurosci* 2012;15(8):1117-1119.doi: [10.1038/nn.3153](https://doi.org/10.1038/nn.3153)

284 [6] Berryman C, Stanton TR, Bowering KJ, Tabor A, McFarlane A, Moseley GL. Do people

285 with chronic pain have impaired executive function? A meta-analytical review. *Clin*

286 *Psychol Rev* 2014;34(7):563-579.doi: [10.1016/j.cpr.2014.08.003](https://doi.org/10.1016/j.cpr.2014.08.003)

## LOCUS COERULEUS AND CHRONIC PAIN

- 287 [7] Berryman C, Stanton TR, Jane Bowering K, Tabor A, McFarlane A, Lorimer Moseley G.  
288 Evidence for working memory deficits in chronic pain: A systematic review and meta-  
289 analysis. *Pain* 2013;154(8):1181-1196.doi: 10.1016/j.pain.2013.03.002
- 290 [8] Bertinotti L, Pietrini U, Del Rosso A, Casale R, Colangelo N, Zoppi M, Matucci-Cerinic M.  
291 The use of pupillometry in joint and connective tissue diseases. *Neuroendocrine Immune*  
292 *Basis of the Rheumatic Diseases II, Proceedings* 2002;966(1):446-455.doi: DOI  
293 10.1111/j.1749-6632.2002.tb04246.x
- 294 [9] Betts MJ, Cardenas-Blanco A, Kanowski M, Spottke A, Teipel SJ, Kilimann I, Jessen F,  
295 Duzel E. Locus coeruleus MRI contrast is reduced in Alzheimer's disease dementia and  
296 correlates with CSF Aβ levels. *Alzheimers Dement (Amst)* 2019;11:281-285.doi:  
297 10.1016/j.dadm.2019.02.001
- 298 [10] Betts MJ, Kirilina E, Otaduy MCG, Ivanov D, Acosta-Cabronero J, Callaghan MF, Lambert  
299 C, Cardenas-Blanco A, Pine K, Passamonti L, Loane C, Keuken MC, Trujillo P,  
300 Lusebrink F, Mattern H, Liu KY, Priovoulos N, Fliessbach K, Dahl MJ, Maass A,  
301 Madelung CF, Meder D, Ehrenberg AJ, Speck O, Weiskopf N, Dolan R, Inglis B, Tosun  
302 D, Morawski M, Zucca FA, Siebner HR, Mather M, Uludag K, Heinsen H, Poser BA,  
303 Howard R, Zecca L, Rowe JB, Grinberg LT, Jacobs HIL, Duzel E, Hammerer D. Locus  
304 coeruleus imaging as a biomarker for noradrenergic dysfunction in neurodegenerative  
305 diseases. *Brain* 2019;142(9):2558-2571.doi: 10.1093/brain/awz193
- 306 [11] Braak H, Thal DR, Ghebremedhin E, Del Tredici K. Stages of the pathologic process in  
307 Alzheimer disease: Age categories from 1 to 100 years. *J Neuropathol Exp Neurol*  
308 2011;70(11):960-969.doi: 10.1097/NEN.0b013e318232a379

## LOCUS COERULEUS AND CHRONIC PAIN

- 309 [12] Burke AL, Mathias JL, Denson LA. Psychological functioning of people living with chronic  
310 pain: A meta-analytic review. *Br J Clin Psychol* 2015;54(3):345-360.doi:  
311 10.1111/bjc.12078
- 312 [13] Cao S, Fisher DW, Yu T, Dong H. The link between chronic pain and Alzheimer's disease. *J*  
313 *Neuroinflammation* 2019;16(1):204.doi: 10.1186/s12974-019-1608-z
- 314 [14] Charlson M, Szatrowski TP, Peterson J, Gold J. Validation of a combined comorbidity  
315 index. *J Clin Epidemiol* 1994;47(11):1245-1251.doi: 10.1016/0895-4356(94)90129-5
- 316 [15] Chen Q, Hayman LL, Shmerling RH, Bean JF, Leveille SG. Characteristics of chronic pain  
317 associated with sleep difficulty in older adults: the Maintenance of Balance, Independent  
318 Living, Intellect, and Zest in the Elderly (MOBILIZE) Boston study. *J Am Geriatr Soc*  
319 2011;59(8):1385-1392.doi: 10.1111/j.1532-5415.2011.03544.x
- 320 [16] Dahlhamer J, Lucas J, Zelaya C, Nahin R, Mackey S, DeBar L, Kerns R, Von Korff M,  
321 Porter L, Helmick C. Prevalence of chronic pain and high-impact chronic pain among  
322 adults - United States, 2016. *Mmwr-Morbidity and Mortality Weekly Report*  
323 2018;67(36):1001-1006.doi: DOI 10.15585/mmwr.mm6736a2
- 324 [17] Dani M, Wood M, Mizoguchi R, Fan Z, Walker Z, Morgan R, Hinz R, Biju M, Kuruvilla T,  
325 Brooks DJ, Edison P. Microglial activation correlates in vivo with both tau and amyloid  
326 in Alzheimer's disease. *Brain* 2018;141(9):2740-2754.doi: 10.1093/brain/awy188
- 327 [18] De Tommaso M, Arendt-Nielsen L, Defrin R, Kunz M, Pickering G, Valeriani M. Pain in  
328 neurodegenerative disease: current knowledge and future perspectives. *Behavioural*  
329 *neurology* 2016;2016.doi:
- 330 [19] Eccles JA, Davies KA. The challenges of chronic pain and fatigue. *Clin Med (Lond)*  
331 2021;21(1):19-27.doi: 10.7861/clinmed.2020-1009

## LOCUS COERULEUS AND CHRONIC PAIN

- 332 [20] Elman JA, Panizzon MS, Hagler DJ, Jr., Eyler LT, Granholm EL, Fennema-Notestine C,  
333 Lyons MJ, McEvoy LK, Franz CE, Dale AM, Kremen WS. Task-evoked pupil dilation  
334 and BOLD variance as indicators of locus coeruleus dysfunction. *Cortex* 2017;97:60-  
335 69.doi: 10.1016/j.cortex.2017.09.025
- 336 [21] Elman JA, Puckett OK, Beck A, Fennema-Notestine C, Cross LK, Dale AM, Eglit GML,  
337 Eyler LT, Gillespie NA, Granholm EL, Gustavson DE, Hagler DJ, Hatton SN, Hauger R,  
338 Jak AJ, Logue MW, McEvoy LK, McKenzie RE, Neale MC, Panizzon MS, Reynolds  
339 CA, Sanderson-Cimino M, Toomey R, Tu XM, Whitsel N, Williams ME, Xian H, Lyons  
340 MJ, Franz CE, Kremen WS. MRI-assessed locus coeruleus integrity is heritable and  
341 associated with multiple cognitive domains, mild cognitive impairment, and daytime  
342 dysfunction. *Alzheimers & Dementia* 2021;17(6):1017-1025.doi: 10.1002/alz.12261
- 343 [22] Elman JA, Puckett OK, Beck A, Fennema-Notestine C, Cross LK, Dale AM, Eglit GML,  
344 Eyler LT, Gillespie NA, Granholm EL, Gustavson DE, Hagler DJ, Jr., Hatton SN,  
345 Hauger R, Jak AJ, Logue MW, McEvoy LK, McKenzie RE, Neale MC, Panizzon MS,  
346 Reynolds CA, Sanderson-Cimino M, Toomey R, Tu XM, Whitsel N, Williams ME, Xian  
347 H, Lyons MJ, Franz CE, Kremen WS. MRI-assessed locus coeruleus integrity is heritable  
348 and associated with multiple cognitive domains, mild cognitive impairment, and daytime  
349 dysfunction. *Alzheimers Dement* 2021.doi: 10.1002/alz.12261
- 350 [23] Ezzati A, Wang C, Katz MJ, Derby CA, Zammit AR, Zimmerman ME, Pavlovic JM,  
351 Sliwinski MJ, Lipton RB. The temporal relationship between pain intensity and pain  
352 interference and incident dementia. *Curr Alzheimer Res* 2019;16(2):109-115.doi:  
353 10.2174/1567205016666181212162424



## LOCUS COERULEUS AND CHRONIC PAIN

- 354 [24] Ghosh S, Wu MD, Shaftel SS, Kyrkanides S, LaFerla FM, Olschowka JA, O'Banion MK.  
355 Sustained interleukin-1beta overexpression exacerbates tau pathology despite reduced  
356 amyloid burden in an Alzheimer's mouse model. *J Neurosci* 2013;33(11):5053-5064.doi:  
357 10.1523/JNEUROSCI.4361-12.2013
- 358 [25] Gill J, Mustapic M, Diaz-Arrastia R, Lange R, Gulyani S, Diehl T, Motamedi V, Osier N,  
359 Stern RA, Kapogiannis D. Higher exosomal tau, amyloid-beta 42 and IL-10 are  
360 associated with mild TBIs and chronic symptoms in military personnel. *Brain Inj*  
361 2018;32(10):1277-1284.doi: 10.1080/02699052.2018.1471738
- 362 [26] Hains BC, Waxman SG. Activated microglia contribute to the maintenance of chronic pain  
363 after spinal cord injury. *J Neurosci* 2006;26(16):4308-4317.doi:  
364 10.1523/JNEUROSCI.0003-06.2006
- 365 [27] Hawker GA, Gignac MA, Badley E, Davis AM, French MR, Li Y, Perruccio AV, Power  
366 JD, Sale J, Lou W. A longitudinal study to explain the pain-depression link in older  
367 adults with osteoarthritis. *Arthritis Care Res (Hoboken)* 2011;63(10):1382-1390.doi:  
368 10.1002/acr.20298
- 369 [28] Hayashida KI, Obata H, Nakajima K, Eisenach JC. Gabapentin acts within the locus  
370 coeruleus to alleviate neuropathic pain. *Anesthesiology* 2008;109(6):1077-1084.doi:  
371 10.1097/ALN.0b013e31818dac9c
- 372 [29] Höfle M, Kenntner-Mabiala R, Pauli P, Alpers GW. You can see pain in the eye:  
373 Pupillometry as an index of pain intensity under different luminance conditions.  
374 *International Journal of Psychophysiology* 2008;70(3):171-175.doi:  
375 <https://doi.org/10.1016/j.ijpsycho.2008.06.008>

## LOCUS COERULEUS AND CHRONIC PAIN

- 376 [30] Howells FM, Stein DJ, Russell VA. Synergistic tonic and phasic activity of the locus  
377 coeruleus norepinephrine (LC-NE) arousal system is required for optimal attentional  
378 performance. *Metabolic Brain Disease* 2012;27(3):267-274.doi: 10.1007/s11011-012-  
379 9287-9
- 380 [31] Ji RR, Nackley A, Huh Y, Terrando N, Maixner W. Neuroinflammation and central  
381 sensitization in chronic and widespread pain. *Anesthesiology* 2018;129(2):343-366.doi:  
382 10.1097/ALN.0000000000002130
- 383 [32] Johannes CB, Le TK, Zhou X, Johnston JA, Dworkin RH. The prevalence of chronic pain in  
384 United States adults: Results of an Internet-based survey. *J Pain* 2010;11(11):1230-  
385 1239.doi: 10.1016/j.jpain.2010.07.002
- 386 [33] Keren NI, Taheri S, Vazey EM, Morgan PS, Granholm AC, Aston-Jones GS, Eckert MA.  
387 Histologic validation of locus coeruleus MRI contrast in post-mortem tissue. *Neuroimage*  
388 2015;113:235-245.doi: 10.1016/j.neuroimage.2015.03.020
- 389 [34] Kremen WS, Franz CE, Lyons MJ. VETSA: the Vietnam Era Twin Study of Aging. *Twin*  
390 *Res Hum Genet* 2013;16(1):399-402.doi: 10.1017/thg.2012.86
- 391 [35] Kremen WS, Franz CE, Lyons MJ. Current status of the Vietnam Era Twin Study of Aging  
392 (VETSA). *Twin Res Hum Genet* 2019;22(6):783-787.doi: 10.1017/thg.2019.125
- 393 [36] Li J, Simone DA, Larson AA. Windup leads to characteristics of central sensitization. *Pain*  
394 1999;79(1):75-82.doi: 10.1016/S0304-3959(98)00154-7
- 395 [37] Llorca-Torralba M, Borges G, Neto F, Mico JA, Berrocoso E. Noradrenergic locus  
396 coeruleus pathways in pain modulation. *Neuroscience* 2016;338:93-113.doi:  
397 10.1016/j.neuroscience.2016.05.057
- 398 [38] Melzack R. Pain and the neuromatrix in the brain. *J Dent Educ* 2001;65(12):1378-1382.doi:

## LOCUS COERULEUS AND CHRONIC PAIN

- 399 [39] Monaco A, Cattaneo R, Mesin L, Ciarrocchi I, Sgolastra F, Pietropaoli D. Dysregulation of  
400 the autonomous nervous system in patients with temporomandibular disorder: A  
401 pupillometric study. *PLoS One* 2012;7(9):e45424.doi: 10.1371/journal.pone.0045424
- 402 [40] Radloff LS. The CES-D Scale. *Applied Psychological Measurement* 2016;1(3):385-401.doi:  
403 10.1177/014662167700100306
- 404 [41] Roberts AW, Ogunwole SU, Blakeslee L, Rabe MA. The population 65 years and older in  
405 the United States: 2016: US Department of Commerce, Economics and Statistics  
406 Administration, US ..., 2018.doi:
- 407 [42] Rodriguez-Raecke R, Niemeier A, Ihle K, Ruether W, May A. Brain gray matter decrease in  
408 chronic pain is the consequence and not the cause of pain. *Journal of Neuroscience*  
409 2009;29(44):13746-13750.doi: <https://doi.org/10.1523/jneurosci.3687-09.2009>
- 410 [43] Roussel NA, Nijs J, Meeus M, Mylius V, Fayt C, Oostendorp R. Central sensitization and  
411 altered central pain processing in chronic low back pain: Fact or myth? *The Clinical*  
412 *journal of pain* 2013;29(7):625-638.doi: 10.1097/AJP.0b013e31826f9a71
- 413 [44] Schoeneborn CA, Heyman KM. Health characteristics of adults aged 55 years and over:  
414 United States, 2004-2007. *National Health Statistics Reports*; no. 16. *National Health*  
415 *Statistics Reports*, Vol. no. 16. Hyattsville, MD: National Center for Health Statistics,  
416 2009.doi:  
417 [http://caregiverslibrary.org/Portals/0/National\\_Health\\_Statistics\\_Aug\\_3\\_2009\\_nhsr016.p](http://caregiverslibrary.org/Portals/0/National_Health_Statistics_Aug_3_2009_nhsr016.pdf)  
418 [df](http://caregiverslibrary.org/Portals/0/National_Health_Statistics_Aug_3_2009_nhsr016.pdf)
- 419 [45] Shibata E, Sasaki M, Tohyama K, Otsuka K, Sakai A. Reduced signal of locus ceruleus in  
420 depression in quantitative neuromelanin magnetic resonance imaging. *Neuroreport*  
421 2007;18(5):415-418.doi: 10.1097/WNR.0b013e328058674a

## LOCUS COERULEUS AND CHRONIC PAIN

- 422 [46] Skljarevski V, Desai D, Liu-Seifert H, Zhang Q, Chappell AS, Detke MJ, Iyengar S,  
423 Atkinson JH, Backonja M. Efficacy and safety of duloxetine in patients with chronic low  
424 back pain. *Spine* 2010;35(13):E578-585.doi: 10.1097/BRS.0b013e3181d3cef6
- 425 [47] Stubbs B, Binnekade TT, Soundy A, Schofield P, Huijnen IP, Eggermont LH. Are older  
426 adults with chronic musculoskeletal pain less active than older adults without pain? A  
427 systematic review and meta-analysis. *Pain Medicine* 2013;14(9):1316-1331.doi:  
428 <https://doi.org/10.1111/pme.12154>
- 429 [48] Suzuki R, Rahman W, Hunt SP, Dickenson AH. Descending facilitatory control of  
430 mechanically evoked responses is enhanced in deep dorsal horn neurones following  
431 peripheral nerve injury. *Brain Research* 2004;1019(1-2):68-76.doi:  
432 10.1016/j.brainres.2004.05.108
- 433 [49] Taylor BK, Westlund KN. The noradrenergic locus coeruleus as a chronic pain generator.  
434 *Journal of Neuroscience Research* 2017;95(6):1336-1346.doi: 10.1002/jnr.23956
- 435 [50] Vachon-Preseau E, Centeno MV, Ren W, Berger SE, Tetreault P, Ghantous M, Baria A,  
436 Farmer M, Baliki MN, Schnitzer TJ, Apkarian AV. The emotional brain as a predictor  
437 and amplifier of chronic pain. *Journal of Dental Research* 2016;95(6):605-612.doi:  
438 10.1177/0022034516638027
- 439 [51] Vazey EM, Moorman DE, Aston-Jones G. Phasic locus coeruleus activity regulates cortical  
440 encoding of salience information. *Proc Natl Acad Sci U S A* 2018;115(40):E9439-  
441 E9448.doi: 10.1073/pnas.1803716115
- 442 [52] Vergne-Salle P, Bertin P. Chronic pain and neuroinflammation. *Joint Bone Spine*  
443 2021;88(6):105222.doi: 10.1016/j.jbspin.2021.105222

## LOCUS COERULEUS AND CHRONIC PAIN

- 444 [53] Ware JE, Jr., Sherbourne CD. The MOS 36-item short-form health survey (SF-36). I.  
445 Conceptual framework and item selection. *Med Care* 1992;30(6):473-483.doi:  
446 <https://www.jstor.org/stable/3765916>
- 447 [54] Whitlock EL, Diaz-Ramirez LG, Glymour MM, Boscardin WJ, Covinsky KE, Smith AK.  
448 Association between persistent pain and memory decline and dementia in a longitudinal  
449 cohort of elders. *JAMA Intern Med* 2017;177(8):1146-1153.doi:  
450 10.1001/jamainternmed.2017.1622
- 451 [55] Zhuo M, Koga K, Yamada A, Song Q, Li X, Chen Q, Liu R, Ge J, Zhan C, Furue H.  
452 Ascending noradrenergic excitation from the locus coeruleus to the anterior cingulate  
453 cortex. *Molecular Brain* 2020;13(1):1-14.doi: [https://doi.org/10.1186/s13041-020-00586-](https://doi.org/10.1186/s13041-020-00586-5)  
454 [5](https://doi.org/10.1186/s13041-020-00586-5)
- 455
- 456
- 457
- 458
- 459

## LOCUS COERULEUS AND CHRONIC PAIN

Table 1. Demographics of sample ( $n = 481$ ).

|                       | %     | $n$ | $M$   | $SD$ | Range          |
|-----------------------|-------|-----|-------|------|----------------|
| Age                   |       |     | 67.52 | 2.60 | 61.96 to 71.72 |
| Chronic pain          | 16.6% | 80  |       |      |                |
| Race                  |       |     |       |      |                |
| Non-Hispanic White    | 88.1% | 498 |       |      |                |
| Education (years)     |       |     | 13.98 | 2.07 | 8 to 20        |
| Medical Comorbidities |       |     |       |      |                |
| 0                     | 17.5% | 84  |       |      |                |
| 1                     | 33.1% | 159 |       |      |                |
| 2+                    | 49.5% | 238 |       |      |                |
| Depressive Symptoms   |       |     | 6.84  | 6.90 | 0 to 47.00     |
| Opioid Medications    |       |     | 1.36  | 0.88 | 0.14 to 9.00   |
| 0                     | 95.0% | 457 |       |      |                |
| 1+                    | 5.0%  | 24  |       |      |                |

Notes. Chronic pain was defined as pain on the SF-36 Bodily Pain Intensity item (Question 22) greater than mild ( $>3/6$ ) in two or more study waves. Medical comorbidities included major health conditions from the Charlson Index. Depressive symptoms were measured from the Center for Epidemiological Studies Depression scale. Opioid medications were coded as the number of opioid medications recorded during the medical history interview.

460

461

Table 2. Main results of general estimating equations predicting rostral  $LC_{CN}$  with bootstrapping.

| Variable                     | $b$  | 95%CI        | $p$  | $\beta$ |
|------------------------------|------|--------------|------|---------|
| Rostral $LC_{CNR}$ (z-score) |      |              |      |         |
| Chronic pain                 | -.35 | -.62 to -.05 | .042 | -.13    |
| Age                          | -.04 | -.05 to -.01 | .027 | -.14    |
| non-Hispanic White           | .05  | -.28 to .38  | .778 | .01     |
| Education (years)            | .03  | -.01 to .08  | .150 | .07     |
| Medical Comorbidities        | .03  | -.06 to .09  | .497 | -.04    |
| Depressive Symptoms          | -.01 | -.02 to .01  | .483 | -.05    |
| Opioid Medication Use        | .45  | .07 to .98   | .061 | .14     |

Notes. CNR = contrast to noise; LC = locus coeruleus. The rostral  $LC_{CNR}$  value was calculated as the average CNR value from the rostral and middle LC regions. The model estimates were conducted using bootstrapping with 1000 resamples. Chronic pain was defined as pain on the SF-36 Bodily Pain Intensity item (Question 22) greater than mild ( $>3/6$ ) in two or more study waves. Medical comorbidities included major health conditions from the Charlson Index. Depressive symptoms were measured from the Center for Epidemiological Studies Depression scale. Opioid medications were coded as the number of opioid medications recorded during the medical history interview.

462

463

## LOCUS COERULEUS AND CHRONIC PAIN

Table 3. Main results of general estimating equations predicting caudal LC<sub>CNR</sub> with bootstrapping.

| Variable                           | <i>b</i> | 95%CI       | <i>p</i> | $\beta$ |
|------------------------------------|----------|-------------|----------|---------|
| Caudal LC <sub>CNR</sub> (z-score) |          |             |          |         |
| Chronic pain                       | -.05     | -.20 to .40 | .755     | -.02    |
| Age                                | -.02     | -.05 to .01 | .065     | -.12    |
| non-Hispanic White                 | -.13     | -.45 to .18 | .409     | -.04    |
| Education (years)                  | .02      | -.02 to .07 | .296     | .05     |
| Medical Comorbidities              | .03      | -.05 to .11 | .418     | .05     |
| Depressive Symptoms                | -.002    | -.03 to .01 | .848     | -.02    |
| Opioid Medication Use              | .16      | -.35 to .72 | .524     | .05     |

Notes. CNR = contrast to noise; LC = locus coeruleus. The model estimates were conducted using bootstrapping with 1000 resamples. Chronic pain was defined as pain on the SF-36 Bodily Pain Intensity item (Question 22) greater than mild (>3/6) in two or more study waves. Medical comorbidities included major health conditions from the Charlson Index. Depressive symptoms were measured from the Center for Epidemiological Studies Depression scale. Opioid medications were coded as the number of opioid medications recorded during the medical history interview.

464

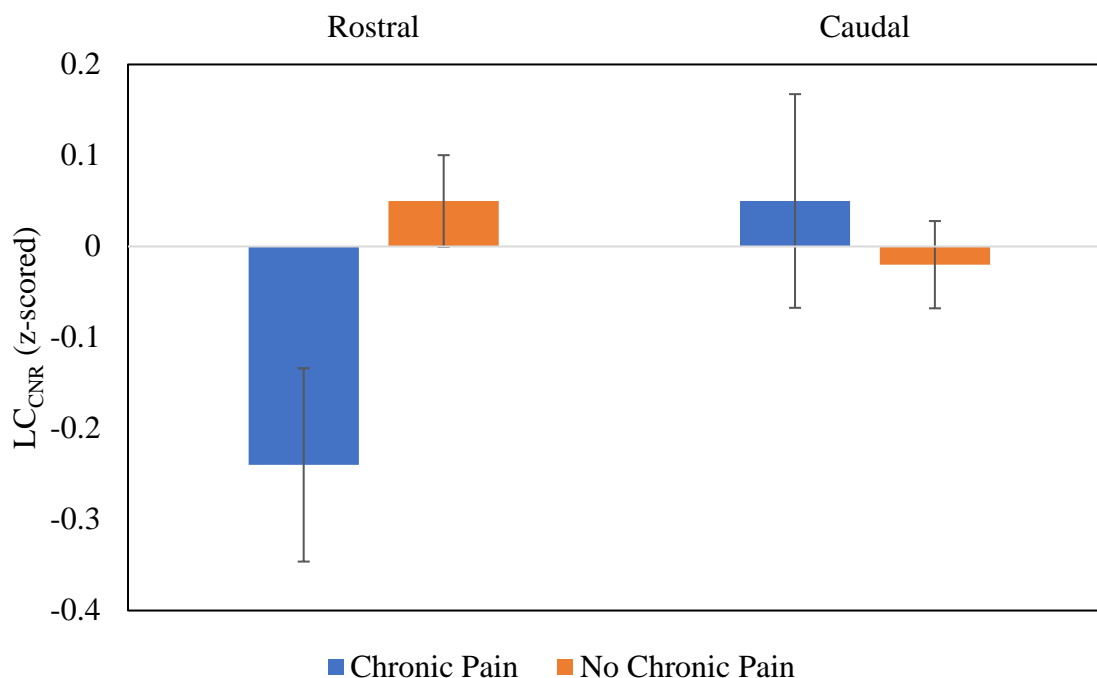

465

466 Figure 1. Differences in the rostral and caudal locus coeruleus integrity measured by locus  
 467 coeruleus contrast to noise ratio (LC<sub>CNR</sub>) in people with and without chronic pain. On this scale,  
 468 0 represents the average LC<sub>CNR</sub> for the whole sample, units away from 0 represent standard  
 469 deviations from the sample average. Rostral LC<sub>CNR</sub> was the average CNR from the rostral and  
 470 middle LC regions.
